# Supplementary material for: Association between person-centred care and healthcare providers’ job satisfaction and work-related health: a scoping review
Source: HighWire-hosted journal article supplement (doi:10.1136/bmjopen-2020-042658), 2020-12-01
Supplement: bmjopen-2020-042658supp001_data_supplement.pdf [file bmjopen-2020-042658supp001_data_supplement.pdf]

## Appendix 1. Search strategy

| Database |                    | Search terms                                                                                                                                                                                                                                                                                                                                                                                                                                                                                                                                                                                                                       | Number of Studies |
|----------|--------------------|------------------------------------------------------------------------------------------------------------------------------------------------------------------------------------------------------------------------------------------------------------------------------------------------------------------------------------------------------------------------------------------------------------------------------------------------------------------------------------------------------------------------------------------------------------------------------------------------------------------------------------|-------------------|
| PubMed   | PCC                | ("Person centered"[tiab]) OR ("person centred"[tiab]) OR ("person centeredness"[tiab]) OR ("personcenteredness"[tiab]) OR ("person centredness"[tiab]) OR ("client centered"[tiab]) OR ("client centred"[tiab]) OR ("patient centered"[tiab]) OR ("patient centred"[tiab]) OR ("Patient-Centered Care"[Mesh]) OR ("relationship centered"[tiab]) OR ("relationship centred"[tiab]) OR ("family centered"[tiab]) OR ("patient focused"[tiab]) OR ("person focused"[tiab])                                                                                                                                                           | 41345             |
|          | Work-related terms | ("Job Satisfaction"[Mesh]) OR ("job satisfaction"[tiab]) OR ("Absenteeism"[Mesh]) OR ("absenteeism"[tiab]) OR ("presenteeism"[Mesh]) OR ("presenteeism"[tiab]) OR ("Occupational Stress"[Mesh]) OR ("occupational stress"[tiab]) OR ("Personnel Turnover"[Mesh]) OR ("personnel turnover"[tiab]) OR ("Sick Leave"[Mesh]) OR ("sick leave"[tiab]) OR ("Stress Psychological"[Mesh]) OR ("stress psychological"[tiab]) OR ("Dyssomnias"[Mesh]) OR ("sleep disorder"[tiab]) OR ("sleep disorders"[tiab]) OR ("sleep disturbances"[tiab]) OR ("occupational health"[Mesh]) OR ("occupational health"[tiab]) OR ("moral stress" [tiab]) | 138520            |
|          | <b>Combination</b> |                                                                                                                                                                                                                                                                                                                                                                                                                                                                                                                                                                                                                                    | <b>600</b>        |
| Cinahl   | PCC                | ("Person centered") OR ("person centred") OR ("person centeredness") OR ("personcenteredness") OR ("person centredness") OR ("client centered") OR ("client centred") OR ("patient centered") OR ("patient centred") OR (MH "Patient Centered Care") OR ("relationship centered") OR ("relationship centred") OR ("family centered") OR ("family centred") OR ("patient focused") OR ("person focused")                                                                                                                                                                                                                            | 11168             |
|          | Work-related terms | (MH "Sleep Disorders+") OR (MH "Stress, Psychological+") OR (MH "Job Satisfaction+") OR (MH "Occupational Health+") OR (MH                                                                                                                                                                                                                                                                                                                                                                                                                                                                                                         | 53933             |

|                  |                    |                                                                                                                                                                                                                                                                                                                                                                                                                        |             |
|------------------|--------------------|------------------------------------------------------------------------------------------------------------------------------------------------------------------------------------------------------------------------------------------------------------------------------------------------------------------------------------------------------------------------------------------------------------------------|-------------|
|                  |                    | "Psychology, Occupational+" OR ("moral stress")                                                                                                                                                                                                                                                                                                                                                                        |             |
|                  | <b>Combination</b> |                                                                                                                                                                                                                                                                                                                                                                                                                        | <b>414</b>  |
| <b>SCOPUS</b>    | PCC                | TITLE-ABS-KEY(("Person centered") OR ("person centred") OR ("person centeredness") OR ("personcenteredness") OR ("person centredness") OR ("client centered") OR ("client centred") OR ("patient centered") OR ("patient centred") OR (MH "Patient Centered Care") OR ("relationship centered") OR ("relationship centred") OR ("family centered") OR ("family centred") OR ("patient focused") OR ("person focused")) | 48324       |
|                  | Work-related terms | TITLE-ABS-KEY(("occupational stress") OR ("staff outcomes") OR ("job strain") OR ("sickness absence") OR ("job satisfaction") OR ("presentism") OR ("presenteeism") OR ("job stress") OR ("sleep disturbances") OR ("personnel turnover") OR ("moral stress") OR ("sick leave") OR ("sleep disturbances"))                                                                                                             | 73958       |
|                  | <b>Combination</b> |                                                                                                                                                                                                                                                                                                                                                                                                                        | <b>566</b>  |
| <b>PsychINFO</b> | PCC                | ("Person centered") OR ("person centred") OR ("person centeredness") OR ("personcenteredness") OR ("person centredness") OR ("client centered") OR ("client centred") OR ("patient centered") OR ("patient centred") OR (MH "Patient Centered Care") OR ("relationship centered") OR ("relationship centred") OR ("family centered") OR ("family centred") OR ("patient focused") OR ("person focused")                | 25306       |
|                  | Work-related terms | ("occupational stress") OR ("staff outcomes") OR ("job strain") OR ("sickness absence") OR ("job satisfaction") OR ("presentism") OR ("presenteeism") OR ("job stress") OR ("sleep disturbances") OR ("personnel turnover") OR ("moral stress") OR ("sick leave") OR ("sleep disturbances")                                                                                                                            | 68187       |
|                  | <b>Combination</b> |                                                                                                                                                                                                                                                                                                                                                                                                                        | <b>271</b>  |
| <b>Total</b>     |                    |                                                                                                                                                                                                                                                                                                                                                                                                                        | <b>1869</b> |
